# Supplementary material for: Identification and characterization of Sr22b, a new allele of the wheat stem rust resistance gene Sr22 effective against the Ug99 race group
Source: PubMed Central journal article supplement (PMC8882774; doi:10.1111/pbi.13737), 2021-11-06
Supplement: PBI-20-554-s001.pdf [file PBI-20-554-s001.pdf]

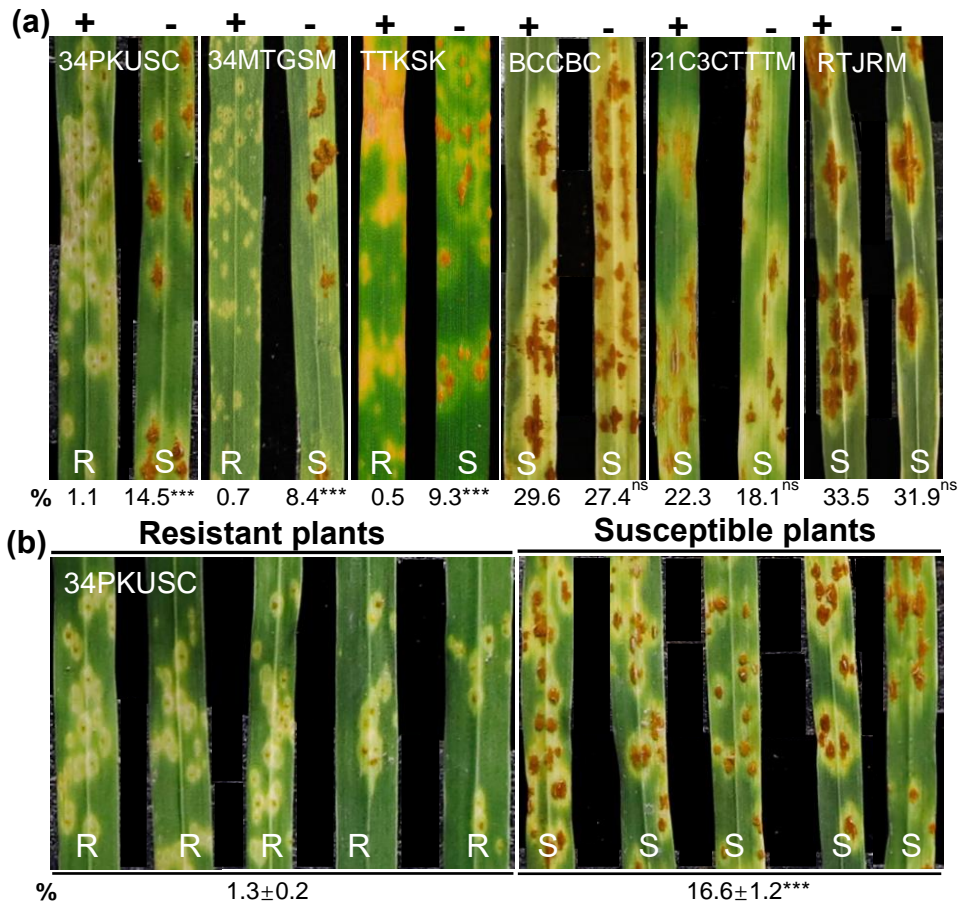

**Figure S1** Reactions to six *Pgt* races 34PKUSC, 34MTGSM, TTKSK, BCCBC, 21C3CTTM and RTJRM. (a) Infection types in *Triticum monococcum* F<sub>5</sub> lines TmR54-3 homozygous for *SrTm5* and its sister line TmS57-57 carrying no stem rust resistance gene. (b) Infection types on segregating resistant and susceptible plants when inoculated with race 34PKUSC. Numbers listed below leaves are average percentage of leaf area covered by *Pgt* pustules (n = 6). +, TmR54-3 (with *SrTm5*); -, TmS57-57 (without *SrTm5*); R, resistant; S, susceptible; ns= not significant ( $P > 0.05$ ), \*\*\*,  $P < 0.001$ .

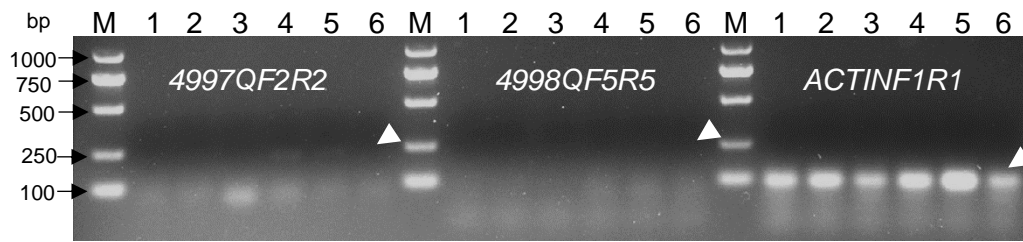

**Figure S2** Semi-quantitative PCR products from markers *4997QF2R2* (260 bp, *TraesCS7A02G499700*), *4998QF5R5* (272 bp, *TraesCS7A02G499800*) and *ACTINF1R1* (*ACTIN*). RNAs were extracted from *Pgt*-inoculated leaves from *SrTm5* monogenic line TmR54-3. cDNAs were synthesized using the Applied Biosystems™ High-Capacity cDNA Reverse Transcription Kits. *ACTIN* was used as endogenous control. Six independent plants were evaluated. 1-3, samples collected at 3 dpi; 4-6, samples collected at 6 dpi; M, markers; Arrowheads indicate the expected band sizes.

|                       |     |                                                                                                                                                                        |     |
|-----------------------|-----|------------------------------------------------------------------------------------------------------------------------------------------------------------------------|-----|
| SCHOMBURBK_R1         | 1   | MAEVLVSASTGAMGSLLRKLGAMLTDEYKLLKNVRGDIKFLKDELEVMC AFL LKMSDV EEPDEPTKLRVTAVREMSYKIEDNIDKFMVLVVEQEHGSSCSEA AHGVA KLMDKCKNLLPDIKARRRIAKEVKDIKKEIKDVS DRFSRYKIDSSSSMP-AKD | 160 |
| IG44855_R2            | 1   | MAEVLVSASTGAMGSLLRKLGAMLTDEYKLLKNVRGDIKFLKDELEVMC AFL LKMSDV EEPDEPTKLRVTAVREMSYKIEDNIDKFMVLV--EHGSSCSEA AHGVA KLMDKCKNLLPDIKARRRIAKEVKDIKKEIKDVS DRFSRYKIDSSSSMP-AKD  | 160 |
| IG44921_R3            | 1   | MAEVLVSASTGAMGSLLRKLGAMLTDEYKLLKNVRGDIKFLKDELEVMC AFL LKMSDV EEPDEPTKLRVTAVREMSYKIEDNIDKFMVLV--EHGSSCSEA AHGVA KLMDKCKNLLPDIKRRRIAKEVKDIKKEIKDVS DRFSRYKIDSSSSMP-AGK   | 160 |
| PI190945_R4           | 1   | MAEVLVSASTGAMGSLLRKLGAMLTDEYKLLKNVRGDIKFLKDELEVMC AFL LKMSDV EEPDEPTKLRVTAVREMSYKIEDNIDKFMVLV--EHGSSCSEA AHGVA KLMDKCKNLLPDIKRRRIAKEVKDIKKEIKDVS DRFSRYKIDSSSSMP-AGK   | 160 |
| PI289605_R5           | 1   | MAEVLVSASTGAMGSLLRKLGAMLTDEYKLLKNVRGDIKFLKDELEVMC AFL LKMSDV EEPDEPTKLRVTAVREMSYKIEDNIDKFMVLVVEQEHGSSCSEA AHGVA KLMDKCKNLLPDIKARRRIAKEVKDIKKEIKDVS DRFSRYKIDSSSSMP-AKD | 160 |
| PI330550_R6           | 1   | MAEVLVSASTGAMGSLLRKLGAMLTDEYKLLKNVRGDIKFLKDELEVMC AFL LKMSDV EEPDEPTKLRVTAVREMSYKIEDNIDKFMVLVVEQEHGSSCSEA AHGVA KLMDKCKNLLPDIKARRRIAKEVKDIKKEIKDVS DRFSRYKIDSSSSMP-AKD | 160 |
| <b>PI306540_SrTm5</b> | 1   | MAEVLVSASTGAMGSLLRKLGAMLTDEYKLLKNVRGDIKFLKDELEVMC AFL LKMSDV EEPDEPTKLRVTAVREMSYKIEDNIDKFMVLV--EHGSSCSEA AHGVA KLMDKCKNLLPDIKRRRIAKEVKDIKKEIKDVS DRFSRYKIDSSSSMP-AGK   | 160 |
| DV92_S1               | 1   | MAEVLVSASTGAMGSLLRKLGAMLTDEYKLLKNVRGDIKFLKDELEVMC AFL LKMSDV EEPDEPTKLRVTAVREMSYKIEDNIDKFMVLV--EHGSSSE-AHGVT KLMDKCKNLLPDIKRRRIAKEVKDIKKEIKDVS DRFLRYKIDSSSSMPAAKD     | 160 |
| IG44878_S2            | 1   | MAEVLVSASTGAMGSLLRKLGAMLTDEYKLLKNVRGDIKFLKDELEVMC AFL LKMSDV EEPDEPTKLRVTAVREMSYKIEDNIDKFMVLV--EHGSSFEA AHGVA KLMDKCKNLLPDIKRRRIAKEVKDIKKEIKDVS DRFSRYKIDSSSSMP-AGK    | 160 |
| PI355523_S3           | 1   | MAEVLVSASTGAMGSLLRKLGAMLTDEYKLLKNVRGDIKFLKDELEVMC AFL LKMSDV EEPDEPTKLRVTAVREMSYKIEDNIDKFMVLVVEQEHGSSCSEA AHGVA KLMDKCKNLLPDIKARRRIAKEVKDIKKEIKDVS DRFSRYKIDSSSSMP-AKD | 160 |
| PI573523_S4           | 1   | MAEVLVSASTGAMGSLLRKLGAMLTDEYKLLKNVRGDIKFLKDELEVMC AFL LKMSDV EEPDEPTKLRVTAVREMSYKIEDNIDKFMVLV--EHGSSCSEA AHGVA KLMDKCKNLLPDIKRRRIAKEVKDIKKEIKDVS DRFSRYKIDSSSSMP-AGK   | 160 |
| WESTONIA_S5           | 1   | MAEVLVSASTGAMGSLLRKLGAMLTDEYKLLKNVRGDIKFLKDELEVMC AFL LKMSDV EEPDEPTKLRVTAVREMSYKIEDNIDKFMVLV--EHGSSCSEA AHGVA KLMDKCKNLLPDIKRRRIAKEVKDIKKEIKDVS DRFSRYKIDSSSSMP-AKE   | 160 |
| PI272557_S6           | 1   | MAEVLVSASTGAMGSLLRKLGAMLTDEYKLLKNVRGDIKFLKDELEVMC AFL LKMSDV EEPDEPTKLRVTAVREMSYKIEDNIDKFMVLVEHE--SSCSEA AHGVA KLMDKCKNLLPDIKRRRIAKEVKDIKKEIKDVS DRFSRYKIDSSSSMP-AGK   | 160 |
|                       |     |                                                                                                                                                                        |     |
| SCHOMBURBK_R1         | 161 | KVDPRRAVYKDAAE LVGIDGPKDELVKWLN EKEGQSLSVSVIVGYGGLGKTTLANQIRVNLGATFDCGAFVVISRKPDMKAILRSILSITQTKDDACSRLLDDIQLIIDKIREFLQDTRYFIIIDDIWELGTWETLKA FVNTLGSRIIITTRIVDVAK      | 320 |
| IG44855_R2            | 161 | KVDPRRAVYKDAAE LVGIDGPKDELVKWLN EKEGQSLSVSVIVGYGGLGKTTLANQIRVNLGATFDCGAFVVISRKPDMKAILRSILSITQTKDDACSRLLDDIQLIIDKIREFLQDTRYFIIIDDIWELGTWETLKA FVNTLGSRIIITTRIVDVAK      | 320 |
| IG44921_R3            | 161 | KVDPRRAVYKDAAE LVGIDGPKDELVKWLN EKEGQSLSVSVIVGYGGLGKTTLANQIRVNLGATFDCGAFVVISRKPDMKAILRSILSITQTKDEACSRLLDDIQLIIDKIREFLQDTRYFIIIDDIWELGTWETLKA FVNTLGSRIIITTRIVDVAK      | 320 |
| PI190945_R4           | 161 | KVDPRRAVYKDAAE LVGIDGPKDELVKWLN EKEGQSLSVSVIVGYGGLGKTTLANQIRVNLGATFDCGAFVVISRKPDMKAILRSILSITQTKDEACSRLLDDIQLIIDKIREFLQDTRYFIIIDDIWELGTWETLKA FVNTLGSRIIITTRIVDVAK      | 320 |
| PI289605_R5           | 161 | KVDPRRAVYKDAAE LVGIDGPKDELVKWLN EKEGQSLSVSVIVGYGGLGKTTLANQIRVNLGATFDCGAFVVISRKPDMKAILRSILSITQTKDDACSRLLDDIQLIIDKIREFLQDTRYFIIIDDIWELGTWETLKA FVNTLGSRIIITTRIVDVAK      | 320 |
| PI330550_R6           | 161 | KVDPRRAVYKDAAE LVGIDGPKDELVKWLN EKEGQSLSVSVIVGYGGLGKTTLANQIRVNLGATFDCGAFVVISRKPDMKAILRSILSITQTKDDACSRLLDDIQLIIDKIREFLQDTRYFIIIDDIWELGTWETLKA FVNTLGSRIIITTRIVDVAK      | 320 |
| <b>PI306540_SrTm5</b> | 161 | KVDPRRAVYKDAAE LVGIDGPKDELVKWLN EKEGQSLSVSVIVGYGGLGKTTLANQIRVNLGATFDCGAFVVISRKPDMKAILRSILSITQTKDEACSRLLDDIQLIIDKIREFLQDTRYFIIIDDIWELGTWETLKA FVNTLGSRIIITTRIVDVAK      | 320 |
| DV92_S1               | 161 | KVDPRRAVYKDAAE LVGIDGPKDELVKWLN EKEGQSLSVSVIVGYGGLGKTTLANQIRVNLGATFDCGAFVVISRKPDMKAILRSILSITQTKDEACPRLLDDIQLIIDKIREFLQDTRYFIIIDDIWELGTWETLKA FVNTLGSRIIITTRIVDVAK      | 320 |
| IG44878_S2            | 161 | KVDPRRAVYKDAAE LVGIDGPKDELVKWLN EKEGQSLSVSVIVGYGGLGKTTLANQIRVNLGATFDCGAFVVISRKPDMKAILRSILSITQTKDDACSRLLDDIQLIIDKIREFLQDTRYFIIIDDIWELGTWETLKA FVNTLGSRIIITTRIVDVAK      | 320 |
| PI355523_S3           | 161 | KVDPRRAVYKDAAE LVGIDGPKDELVKWLN EKEGQSLSVSVIVGYGGLGKTTLANQIRVNLGATFDCGAFVVISRKPDMKAILRSILSITQTKDDACSRLLDDIQLIIDKIREFLQDTRYFIIIDDIWELGTWETLKA FVNTLGSRIIITTRIVDVAK      | 320 |
| PI573523_S4           | 161 | KVDPRRAVYKDAAE LVGIDGPKDELVKWLN EKEGQSLSVSVIVGYGGLGKTTLANQIRVNLGATFDCGAFVVISRKPDMKAILRSILSITQTKDDACSRLLDDIQLIIDKIREFLQDTRYFIIIDDIWELGTWETLKA FVNTLGSRIIITTRIVDVAK      | 320 |
| WESTONIA_S5           | 161 | KVDPRRAVYKDVTE LVGIDGPKDELVKWLN EKEGQSLSVSVIVGYGGLGKTTLANQIRVNLASFDCGAFVVISRKPDMKAILRSILSITQTKDDAYSRLDDIQLIIDKIREFLQDTRYFIIIDDIWELGTWETLKA FVNTLGSRIIITTRIVDVAK        | 320 |
| PI272557_S6           | 161 | KVDPRRAVYKDAAE LVGIDGPKDELVKWLN EKEGQSLSVSVIVGYGGLGKTTLANQIRVNLGATFDCGAFVVISRKPDMKAILRSILSITQTKDDACSRLLDDIQLIIDKIREFLQDTRYFIIIDDIWELGTWETVKA FVNTLGSRIIITTRIVDVAK      | 320 |
|                       |     |                                                                                                                                                                        |     |
| SCHOMBURBK_R1         | 321 | SCSPSS E DLVYEMKPLSEADSKKLFKKRIFGCEESCPDSLKEAANDILKCRGLPLAINAISSLVTTRETKEEWDVRVRSIRSSKVKSDIETMNYILSLSYFDLPHHLRSCLLYLALFPEDQLIGRKR LVRRWISSEGF IHGESGQDLMELGEEYFHQL     | 480 |
| IG44855_R2            | 321 | SCSPSS E DLVYEMKPLSEADSKKLFKKRIFGCEESCPDSLKEAANDILKCRGLPLAINAISSLVTTRETKEEWDVRVRSIRSSKVKSDIETMNYILSLSYFDLPHHLRSCLLYLALFPEDQLIGRKR LVRRWISSEGF IHGESGQDLMELGEEYFHQL     | 480 |
| IG44921_R3            | 321 | SCSPSS E DLVYEMKPLSEADSKKLFKKRIFGCEESCPDSLKEAANDILKCRGLPLAINAISSLVTTRETKEEWDVRVRSIRSSKVKSDIETMNYILSLSYFDLPHHLRSCLLYLALFPEDQLIGRKR LVRRWISSEGF IHGESGQDLMELGEEYFHQL     | 480 |
| PI190945_R4           | 321 | SCSPSS E DLVYEMKPLSEADSKKLFKKRIFGCEESCPDSLKEAANDILKCRGLPLAINAISSLVTTRETKEEWDVRVRSIRSSKVKSDIETMNYILSLSYFDLPHHLRSCLLYLALFPEDQLIGRKR LVRRWISSEGF IHGESGQDLMELGEEYFHQL     | 480 |
| PI289605_R5           | 321 | SCSPSS E DLVYEMKPLSEADSKKLFKKRIFGCEESCPDSLKEAANDILKCRGLPLAINAISSLVTTRETKEEWDVRVRSIRSSKVKSDIETMNYILSLSYFDLPHHLRSCLLYLALFPEDQLIGRKR LVRRWISSEGF IHGESGQDLMELGEEYFHQL     | 480 |
| PI330550_R6           | 321 | SCSPSS E DLVYEMKPLSEADSKKLFKKRIFGCEESCPDSLKEAANDILKCRGLPLAINAISSLVTTRETKEEWDVRVRSIRSSKVKSDIETMNYILSLSYFDLPHHLRSCLLYLALFPEDQLIGRKR LVRRWISSEGF IHGESGQDLMELGEEYFHQL     | 480 |
| <b>PI306540_SrTm5</b> | 321 | SCSPSS E DLVYEMKPLSEADSKKLFKKRIFGCEESCPDSLKEAANDILKCRGLPLAINAISSLVTTRETKEEWDVRVRSIRSSKVKSDIETMNYILSLSYFDLPHHLRSCLLYLALFPEDQLIGRKR LVRRWISSEGF IHGESGQDLMELGEEYFHQL     | 480 |
| DV92_S1               | 321 | SCSPSS E DLVYEMKPLSEADSKKLFKKRIFGCEESCPDSLKEAANDILKCRGLPLAINAISSLVTTRETKEEWDVRVRSIRSSKVKSDIETMNYILSLSYFDLPHHLRSCLLYLALFPEDQLIERKR LVRRWISSEGF IHGESGQALMELGEEYFHQL     | 480 |
| IG44878_S2            | 321 | SCSPSS E DLVYEMKPLSEADSKKLFKKRIFGCEESCPDSLKEAANDILKCRGLPLAINAISSLVTTRETKEEWDVRVRSIRSSKVKSDIETMNYILSLSYFDLPHHLRSCLLYLALFPEDQLIGRKR LVRRWISSEGF IHGESGQDLMELGEEYFHQL     | 480 |
| PI355523_S3           | 321 | SCSPSS E DLVYEMKPLSEADSKKLFKKRIFGCEESCPDSLKEAANDILKCRGLPLAINAISSLVTTRETKEEWDVRVRSIRSSKVKSDIETMNYILSLSYFDLPHHLRSCLLYLALFPEDQLIGRKR LVRRWISSEGF IHGESGQDLMELGEEYFHQL     | 480 |
| PI573523_S4           | 321 | SCSPSS E DLVYEMKPLSEADSKKLFKKRIFGCEESCPDSLKEAANDILKCRGLPLAINAISSLVTTRETKEEWDVRVRSIRSSKVKSDIETMNYILSLSYFDLPHHLRSCLLYLALFPEDQLIGRKR LVRRWISSEGF IHGESGQDLMELGEEYFHQL     | 480 |
| WESTONIA_S5           | 321 | SCSPSS E DLVYEMKPLSEADSKKLFKKRIFGCEESCPDSLKEAANDILKCRGLPLAINAISSLVTTRETKEEWDVRVRSIHSSKVKSDIETMNYILSLSYFDLPHHLRSCLLYLALFPEDQLIGRKR LVRRWISSEGF IHGESGQDLMELGEEYFHQL     | 480 |
| PI272557_S6           | 321 | SCSPSS E DLVYEMKPLSEADSKKLFKKRIFGCEESCPDSLKEAANDILKCRGLPLAINAISSLVTTRETKEEWDVRVRSIRSSKVKSDIETMNYILSLSYFDLPHHLRSCLLYLALFPEDQLIGRKR LVRRWISSEGF IHGESGQDLMELGEEYFHQL     | 480 |

|                       |     |                                                                                                                                                                 |                                  |     |
|-----------------------|-----|-----------------------------------------------------------------------------------------------------------------------------------------------------------------|----------------------------------|-----|
| SCHOMBURBK_R1         | 481 | VNRSLIQPGNIGYDGKAMYCRVHDTILDFLIDKSSEENMCTVLKKQCKPNGIVRRLSLMGNEDEEIVEQLDLSHARSITAFGDIKLLPSSLGRSKCLRVLDLQCDQLENHHIKDIERLYQLRYLDIS                                 | TGITELPRQIGELLYLETLV--AY-GLRELPE | 640 |
| IG44855_R2            | 481 | VNRSLIQPGNIGYDGKAMYCRVHDTILDFLIDKSSEENMCTVLKKQCKPNGIVRRLSLMGNEDEEIVEQLDLSHARSITAFGDIKLLPSSLGRSKCLRVLDLQCDQLENHHIKDIERLYQLRYLDIS                                 | TGITELPRQIGELLYLETLV--AY-GLRELPE | 640 |
| IG44921_R3            | 481 | VNRSLIQPGNIGYDGKAMYCRVHDTILDFLIDKSSEENMCTVLKKQCKPNGIVRRLSLMGNEDEEIVEQLDLSHARSITAFGDIKLLPSSLGRSKCLRVLDLQCDQLENHHIKDIERLYQLRYLDIS                                 | TGITELPRQIGELLYLETLV--AY-GLRELPE | 640 |
| PI190945_R4           | 481 | VNRSLIQPGNIGYDGKAMYCRVHDTILDFLIDKSSEENMCTVLKKQCKPNGIVRRLSLMGNEDEEIVEQLDLSHARSITAFGDIKLLPSSLGRSKCLRVLDLQCDQLENHHIKDIERLYQLRYLDIS                                 | TGITELPRQIGELLYLETLV--AY-GLRELPE | 640 |
| PI289605_R5           | 481 | VNRSLIQPGNIGYDGKAMYCRVHDTILDFLIDKSSEENMCTVLKKQCKPNGIVRRLSLMGNEDEEIVEQLDLSHARSITAFGDIKLLPSSLGRSKCLRVLDLQCDQLENHHIKDIERLYQLRYLDIS                                 | TGITELPRQIGELLYLETLV--AY-GLRELPE | 640 |
| PI330550_R6           | 481 | VNRSLIQPGNIGYDGKAMYCRVHDTILDFLIDKSSEENMCTVLKKQCKPNGIVRRLSLMGNEDEEIVEQLDLSHARSITAFGDIKLLPSSLGRSKCLRVLDLQCDQLENHHIKDIERLYQLRYLDIS                                 | TGITELPRQIGELLYLETLV--AY-GLRELPE | 640 |
| <b>PI306540_SrTm5</b> | 481 | VNRSLIQPGNIGYDGKAMYCRVHDTILDFLIDKSSEENMCTVLKKQCKPNGIVRRLSLMGNEDEEIVEQLDLSHARSITAFGDIKLLPSSLGRSKCLRVLDLQCDQLENHHIKDIERLYQLRYLDIS                                 | TGITELPRQIGELLYLETLV--AY-GLRELPE | 640 |
| DV92_S1               | 481 | VNRSLIQPGNIGYDGKAEYCRVHDTILDFLIDKSSEENMCTVLKKQCKPNGIVRRLSLMGNEDEEIVEQLDLSHARSISAFGDIKLLPSSLGRSKCLRVLDLQCGCYLKNHHIKDIERLYQLRYLDIS                                | TGITELPRQIGELLYLETLV-TSY-GLRELPE | 640 |
| IG44878_S2            | 481 | VNRSLIQPGNIGYDGKAKYCRVHDTILDFLIDKSSEENMCTVLKKQCKPNGIVRRLSLMGNEDEEIVEQLDLSHARSISAFGDIKLLPSSLGRSKCLRVLDLQCGCYLKNHHIKDIERLYQLRYLDIS                                | TGITELPRQIGELLYLETLVTSY-GLRELPE  | 640 |
| PI355523_S3           | 481 | VNRSLIQPGNIGYDGKAMYCRVHDTILDFLIDKSSEENMCTVLKKQCKPNGIVRRLSLMGNEDEEIVEQLDLSHARSISAFGDIKLLPSSLGRSKCLRVLDLQCDQLENHHIKDIERLYQLRYLDIS                                 | TGITELPRQIGELLYLETLV--AS-GLRELPE | 640 |
| PI573523_S4           | 481 | VNRSLIQPGNIGYDGKAEYCRVHDTILDFLIDKSSEENMCTVLKKQCKPNGIVRRLSLMGNEDEEIVEQLDLSHARSISAFGDIKLLPSSLGRSKCLRVLDLQCGCYLKNHHIKDIERLYQLRYLDIS                                | TGITELPRQIGELLYLETLVTSY-GLRELPE  | 640 |
| WESTONIA_S5           | 481 | VNRSLIQPDYIGYDGKTEYCRVHDTILDFLIDKSSEENMCTVLKKQCKPNGIVRRLSLMGNEDEEIVEQLDLSHARSISAFGDIKLLPSSLGRSKCLRVLDLQCGQLENHHIKDIERLYQLRYLDIS                                 | TGITELPRQIGELLYLETLV--TSDGLRELPE | 640 |
| PI272557_S6           | 481 | VNRSLIQPDNIGYDGKAKYCRVHDTILDFLIDKSSEENMCTVLKKQCKPNGIVRRLSLMGNEDEEIVEQLDLSHARSITAFRDIKLLPSSLGRSKCLRVLDLQACQLENHHIKDIERLYQLRYLDIS                                 | TGITELPRQIGELLYLETLV--TSYRLRELPE | 640 |
|                       |     |                                                                                                                                                                 |                                  |     |
| SCHOMBURBK_R1         | 641 | STSRQLRLARLFVYSGCKLPGLGNLNLQELDCVDALHLKHVEELGKLTNLRKLSIKLDTGGIEGNKLEESKEKLVSSLCKLDECGLLSLSIDYYLREKDGEEFFLPALGCIQEVFVYQDISRISRWLASLPNLHRLFLDDP--KIEQQDIEMIGLI-   | 800                              |     |
| IG44855_R2            | 641 | STSRQLRLARLFVYSGCKLPGLGNLNLQELDCVDALHLKHVEELGKLTNLRKLSIKLDTGGIEGNKLEESKEKLVSSLCKLDECGLLSLSIDYYLREKDGEEFFLPALGCIQEVFVYQDISRISRWLASLPNLHRLFLDDP--KIEQQDIEMIGLI-   | 800                              |     |
| IG44921_R3            | 641 | STSRQLRLARLFVYSGCKLPGLGNLNLQELDCVDALHLKHVEELGKLTNLRKLSIKLDTGGIEGNKLEESKEKLVSSLCKLDECGLLSLSIDYYLREKDGEEFFLPALGCIQEVFVYQDISRISRWLASLPNLHRLFLDDP--KIEQQDIEMIGLI-   | 800                              |     |
| PI190945_R4           | 641 | STSRQLRLARLFVYSGCKLPGLGNLNLQELDCVDALHLKHVEELGKLTNLRKLSIKLDTGGIEGNKLEESKEKLVSSLCKLDECGLLSLSIDYYLREKDGEEFFLPALGCIQEVFVYQDISRISRWLASLPNLHRLFLDDP--KIEQQDIEMIGLI-   | 800                              |     |
| PI289605_R5           | 641 | STSRQLRLARLFVYSGCKLPGLGNLNLQELDCVDALHLKHVEELGKLTNLRKLSIKLDTGGIEGNKLEESKEKLVSSLCKLDECGLLSLSIDYYLREKDGEEFFLPALGCIQEVFVYQDISRISRWLASLPNLHRLFLDDP--KIEQQDIEMIGLI-   | 800                              |     |
| PI330550_R6           | 641 | STSRQLRLARLFVYSGCKLPGLGNLNLQELDCVDALHLKHVEELGKLTNLRKLSIKLDTGGIEGNKLEESKEKLVSSLCKLDECGLLSLSIDYYLREKDGEEFFLPALGCIQEVFVYQDISRISRWLASLPNLHRLFLDDP--KIEQQDIEMIGLI-   | 800                              |     |
| <b>PI306540_SrTm5</b> | 641 | STSRQLRLARLFVYSGCKLPGLGNLNLQELDCVDALHLKHVEELGKLTNLRKLSIKLDTGGIEGNKLEESKEKLVSSLCKLDECGLLSLSIDYYLREKDGEEFFLPALGCIQEVFVYQDISRISRWLASLPNLHRLFLDDP--KIEQQDIEMIGLI-   | 800                              |     |
| DV92_S1               | 641 | STSRQLRLARLFVYHCKLPGLGNLNLQELDCVDALQKHVEELGKLTNLRKLSIKLDTGGIEGNKLEESKEKLVSSLCKLDECGLRSLSIHYLREKDGEEFFLPALGCIQEVFVYQDISRISRWLASLPNLHRLFLDDP--KIEQQDIEMIGLI-      | 800                              |     |
| IG44878_S2            | 641 | STSRQLRLARLFVDSGCKLPGLGNLNLQELDCVDALQKHVEELGKLTNLRKLRKIKLDTGGIEGNKLEESKEKLVSSLCKLDECGLLSLSIHYLREKDGEEFFLPALGCIQEVFVYQDISRISRWLASLPNLHRLFLDDP--KIEQQDIEMIALRE    | 800                              |     |
| PI355523_S3           | 641 | STSRQLRLARLFVDSGCKLPGLGNLNLQELDCVDALQKHVEELGKLTNLRKLRKIKLDTGGIEGNKLEESKEKLVSSLCKLDECGLRSLSIHYLREKDGEEFFLPALGCIQEVFVYQDISRISRWLASLPNLHRLFLDDP--KIEQQDIEMIGLI-    | 800                              |     |
| PI573523_S4           | 641 | STSRQLRLARLFVDSGCKLPGLGNLNLQELDCVDALQKHVEELGKLTNLRKLRKIKLDTGGIEGNKLEESKEKLVSSLCKLDECGLLSLSIHYLREKDGEEFFLPALGCIQEVFVYQDISRISRWLASLPNLHRLFLDDP--KIEQQDIEMIGLI-    | 800                              |     |
| WESTONIA_S5           | 641 | STSRQLRLARLIVGDCCKLPGLGNLNLQELDCVAGLHLKHAEEELGKLTNLRKLRKINLYTHGIEGNKLEESKEKLVSSLCKLDECGLRSLSIDYYLREKDGEEFFLPALGCIQEVFVYQDISRISRWLASLPNLHRLFLDDP--KIEQQDIEMIGLI- | 800                              |     |
| PI272557_S6           | 641 | STSRQLRLARLFVDPGCKLPGLGNLNLQELDWDVALQKHVEELGKLTNLRKLRKIKLDTGGIEGNKLEESKEKLVSSLCKLDECGLRSLSIHYLREKDGEEFFLPALGCIQEVSVYQDISRISRWLASLPNLHMLFFDYV--KIEQQDIEMIGLI-    | 800                              |     |
|                       |     |                                                                                                                                                                 |                                  |     |
| SCHOMBURBK_R1         | 801 | PNLIDLTLPELYKTDDA-GRLIIRREGFQQLQRFEAYNTRMGVLMFEPGAMPRLKELKLNHFIEKPKSAAVDFDFGIQLSSLARLTVSLSCGGWTVAEVEAAEDAFKSMAEANPNRPILEMTRYNTQHMLQDEQIGMTGSATTPAVK             | 949                              |     |
| IG44855_R2            | 801 | PNLIDLTLPELYKTDDA-GRLIIRREGFQQLQRFEAYNTRMGVLMFEPGAMPRLKELKLNHFIEKPKSAAVDFDFGIQLSSLARLTVSLSCGGWTVAEVEAAEDAFKSMAEANPNRPILEMTRYNTQHMLQDEQIGMTGSATTPAVK             | 949                              |     |
| IG44921_R3            | 801 | PNLIDLTLPELYKTDDA-GRLIIRREGFQQLQRFEAYNTRMGVLMFEPGAMPRLKELKLNHFIEKPKSAAVDFDFGIQLSSLARLTVSLSCGGWTVAEVEAAEDAFKSMAEANPNRPILEMTRYNTQHMLQDEQIGMTGSATTPAVK             | 949                              |     |
| PI190945_R4           | 801 | PNLIDLTL-YLRITDDA-GRLIIRREGFQQLQRFELSRIRMGDLMEFEGAMPRLKELIYHFIEKPKSGAVDFDFGIQLSSLARLTVGLLCVGSTAAEVEAAEDAFKSMAEANPNRPILEMTRYLPQHMLQDEQIGMTGSATTPAVK              | 949                              |     |
| PI289605_R5           | 801 | PNLIDLTL-YLRITDDA-GRLIIRREGFQQLQRFELSRIRMGDLMEFEGAMPRLKELIYHFIEKPKSGAVDFDFGIQLSSLARLTVGLLCVGSTAAEVEAAEDAFKSMAEANPNRPILEMTRYLPQHMLQDEQIGMTGSATTPAVK              | 949                              |     |
| PI330550_R6           | 801 | PNLIDLTL-YLRITDDA-GRLIIRREGFQQLQRFELSRIRMGDLMEFEGAMPRLKELIYHFIEKPKSGAVDFDFGIQLSSLARLTVGLLCVGSTAAEVEAAEDAFKSMAEANPNRPILEMTRYLPQHMLQDEQIGMTGSATTPAVK              | 949                              |     |
| <b>PI306540_SrTm5</b> | 801 | PNLIDLTL-SLYKTDDA-GRLIIRREGFQQLQRFVYHTRMGVLMFEPGAMPRLKELIYDFIEKPKSGAVDFDFGIQLSSLARLTVGLLCVGSTAAEVEAAEDAFKSMAEANPNRPILEMTRYLPQHMLQDEQIGMTGSATTPAVK               | 949                              |     |
| DV92_S1               | 801 | PNLMDLTL-YLRITDDAMPRLIIRREGFQQLQRFELSRIRMGDLMEFEGAMPRLKELIYDFIEKPKSGAVDFDFGIQLSSLARLTVGLLCVGSTAAEVEAAEDAFKSMAEANPNRPILEMTRYLPQHMLQDEQIGMTGSATTPAVK              | 949                              |     |
| IG44878_S2            | 801 | PNLMDLTL-YLICITDDA-GRLIIRREGFQQLQRFELSRIRMGDLMEFEGAMPRLKELIYDFIEKPKSGAVDFDFGIQLSSLARLTVGLLCVGSTAAEVEAAEDAFKSMAEANPNRPILEMTRYNTQHMLQDEQIGMTGSATTPAVK             | 949                              |     |
| PI355523_S3           | 801 | PNLIDLTL-PLYKTDDA-GRLIIRREGFQQLQRFEAYNTRMGVLMFEPGAMPRLKELKLNHFIEKPKSAAVDFDFGIQLSSLARLTVGLLCVGSTAAEVEAAEDAFKSMAEANPNRPILEMTRYNTQHMLQDEQIGMTGSATTPAVK             | 949                              |     |
| PI573523_S4           | 801 | PNLMDLTL-YLICITDDA-GRLIIRREGFQQLQRFELSRIRMGDLMEFEGAMPRLKELIYDFIEKPKSGAVDFDFGIQLSSLARLTVGLLCVGSTAAEVEAAEDAFKSMAEANPNRPILEMTRYNTQHMLQDEQIGMTGSATTPAVK             | 949                              |     |
| WESTONIA_S5           | 801 | PNLIDLTL-SLPGTDDA-GRFIITREGFQQLQSFELSGSRMGVL-FEPGAMPRLKELIYDFIEKPKSAAVDFDFGIQLSSLARLTVSLACVYRSTAAEVEAAEDAFKSMAEANPNRPILEMTRYLPQHMRVDEQIDMAGSATTPAVK             | 949                              |     |
| PI272557_S6           | 801 | PNLIDLTL-SLRKTDDA-GRLIIRREGFQHLHFRVYDTRMGVLMFEPGAMPRLKELKLNHFIEKPKSGAVDFDFGIQLSSLARLTVSLFCVGSTAAEVEAAEDAFKSMAEANPNRPILEMIRVNPVHMF-DEQIDMAGSATTPAVK              | 949                              |     |

**Figure S3** SrTm5 protein sequence analysis. Multiple sequence alignment between SrTm5 and reported Sr22 resistant and susceptible protein sequences (Steuernagel et al. 2016). Highlighted in green are protein polymorphisms that discriminate perfectly between Sr22 susceptible and resistant haplotypes. Highlighted in yellow are Sr22b unique protein polymorphisms compared with other Sr22 resistant haplotypes.

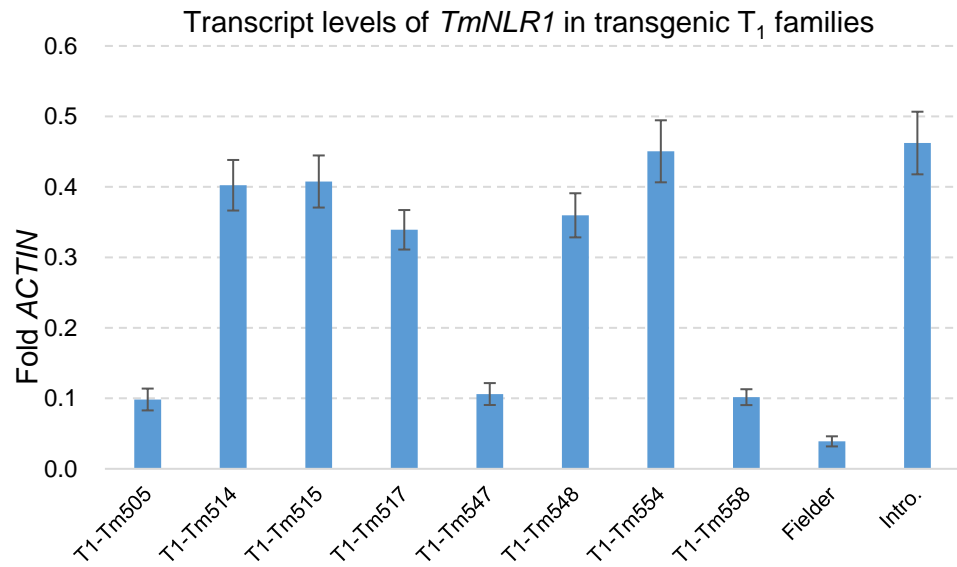

**Figure S4** Transcript levels of *TmNLR1* in transgenic T<sub>1</sub> families (three positive plants per event, n = 3). Transcript levels are expressed as fold-*ACTIN* using the  $2^{\Delta CT}$  method. Fielder, susceptible control; Intro., *SrTm5* introgression plants (BC<sub>3</sub>F<sub>2</sub>, positive control). Error bars are standard errors of the mean.



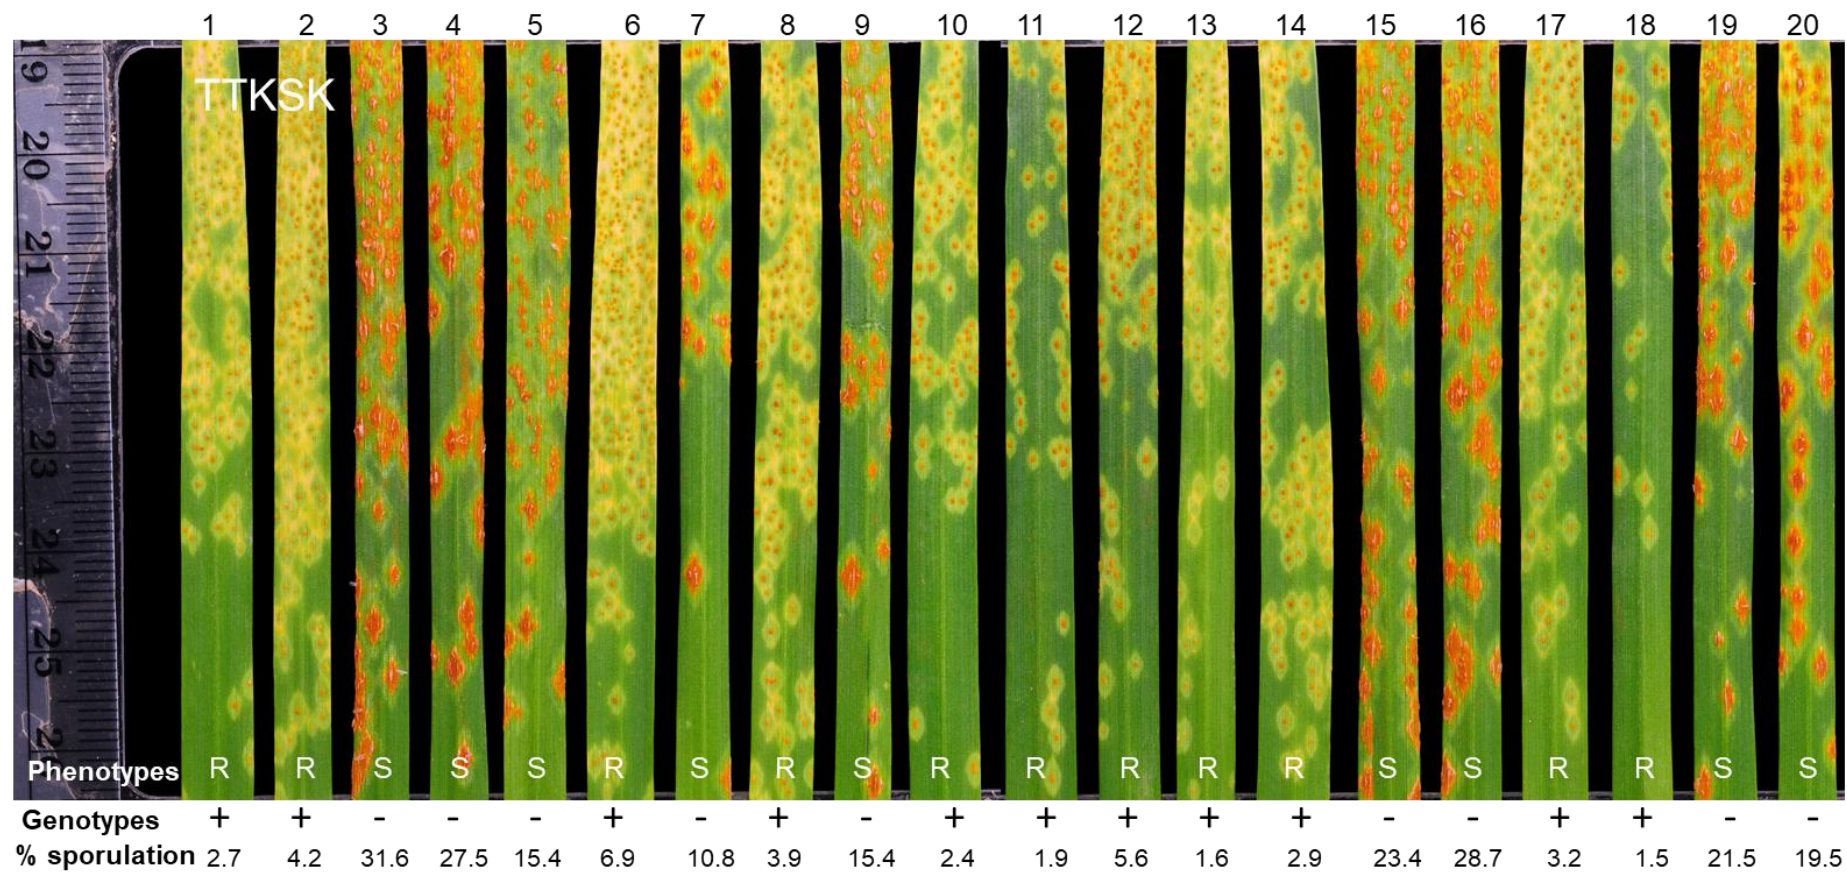

**Figure S5** Reactions to *Pgt* race TTKSK (Ug99) in transgenic family T<sub>2</sub>Tm515-6. This family showed segregation for resistance. Genotyping of the plants with markers *Tm5F3R4*, *TM5TF2R2*, and *TM5TF3R3* (Table 1) revealed a perfect co-segregation between the presence of transgene and the phenotypes. The numbers below the figure indicate the average percentage of the leaf area covered by *Pgt* pustules. S, susceptible; R, resistant; +, with transgene; -, without transgene.

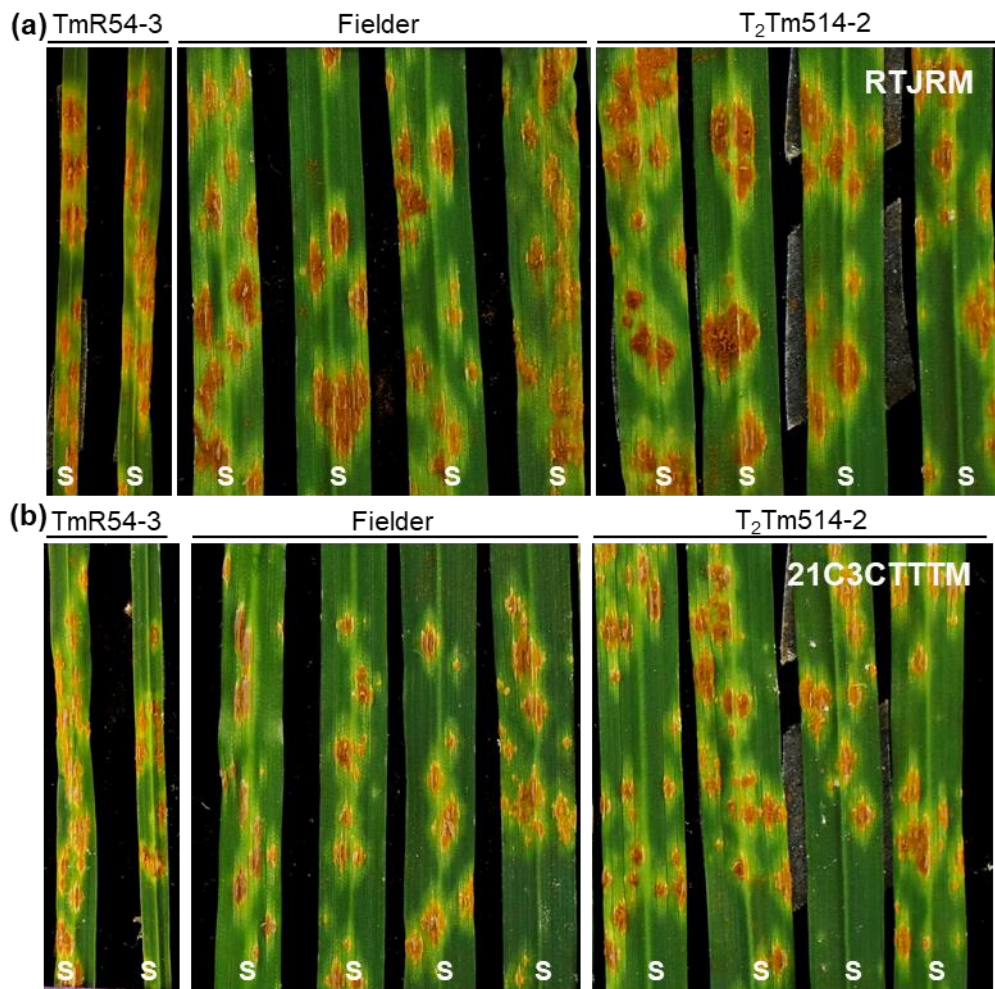

**Figure S6** Transgenic family T<sub>2</sub>Tm514-2 homozygous for the transgene were inoculated with two *SrTm5*-virulent *Pgt* races RTJRM and 21C3CTTMM. (a) Stem rust reactions to *Pgt* race RTJRM. (b) Stem rust reactions to *Pgt* race 21C3CTTMM. All the tested plants from transgenic family T<sub>2</sub>Tm514-2 were susceptible to these two races suggesting similar race specificity between the transgene and natural *SrTm5* in *T. monococcum*. Figure 2a in the main text presents stem rust reactions from the same transgenic family T<sub>2</sub>Tm514-2 against *Pgt* race TTKSK.



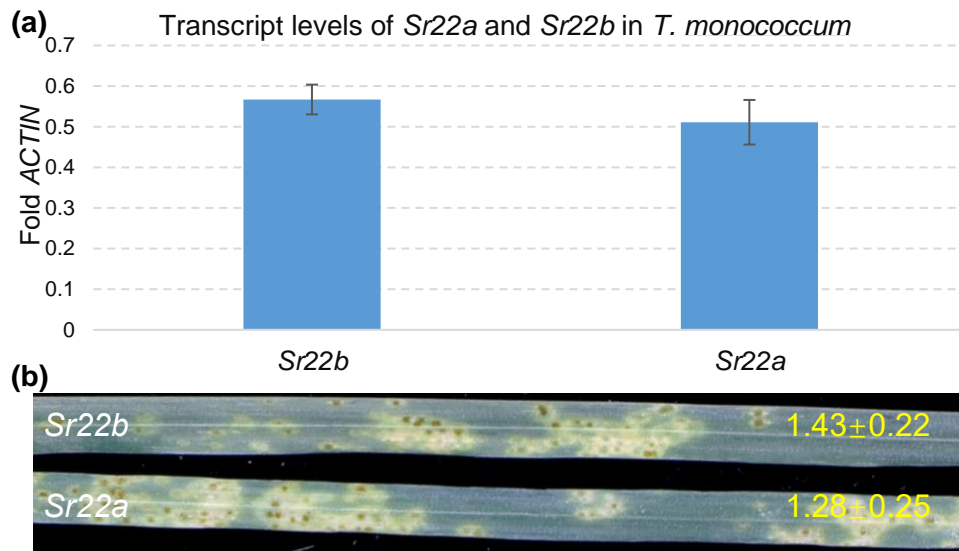

**Figure S7** Transcript levels and infection types of *Sr22a* and *Sr22b* in *T. monococcum* background. (a) Transcript levels of *Sr22a* and *Sr22b* in *T. monococcum*. Leaves were collected from *T. monococcum* accession PI 190945 (*Sr22a*) and *T. monococcum* line TmR54-3 (*Sr22b*) without *Pgt* inoculation. Plants were grown in growth chambers at 22 °C day / 20 °C night with 16 hours light / 8 hours dark. Transcript levels were expressed as fold-*ACTIN* (n = 6). Error bars are standard errors of the mean. (b) Infection types on *T. monococcum* plants of PI 190945 (*Sr22a*) and TmR54-3 (*Sr22b*) when inoculated with *Pgt* race 34PKUSC. No significant differences were observed between the two genotypes in average percentage of leaf area covered by *Pgt* pustules using software ASSESS v2 (n = 5).

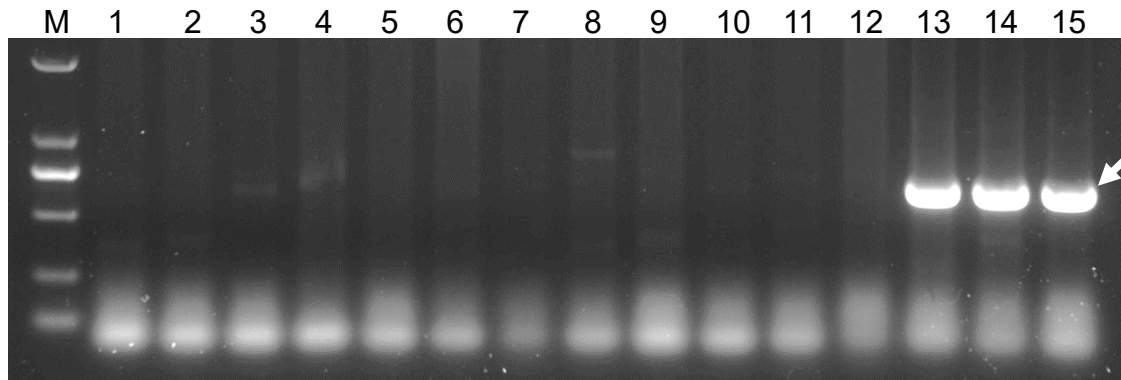

**Figure S8** PCR products from the *Sr22b* diagnostic marker *TM5TF2R2*. The amplicons of 673 bp (white arrow) were present only in resistant *T. monococcum* accessions carrying *Sr22b*. 1, Xiaoyan22 (6x); 2, Chinese Spring (6x); 3, Chuanmai42 (6x); 4, Fielder (6x); 5, 8155B (4x); 6, Rusty (4x); 7, D447 (4x); 8, Kronos (4x); 9, PI 272557 (2x); 10, PI 418580 (2x); 11, PI 487249 (2x); 12, PI 427507 (2x); 13, PI 306540 (2x); 14, PI 377668 (2x); 15, PI 362610 (2x); M, markers.

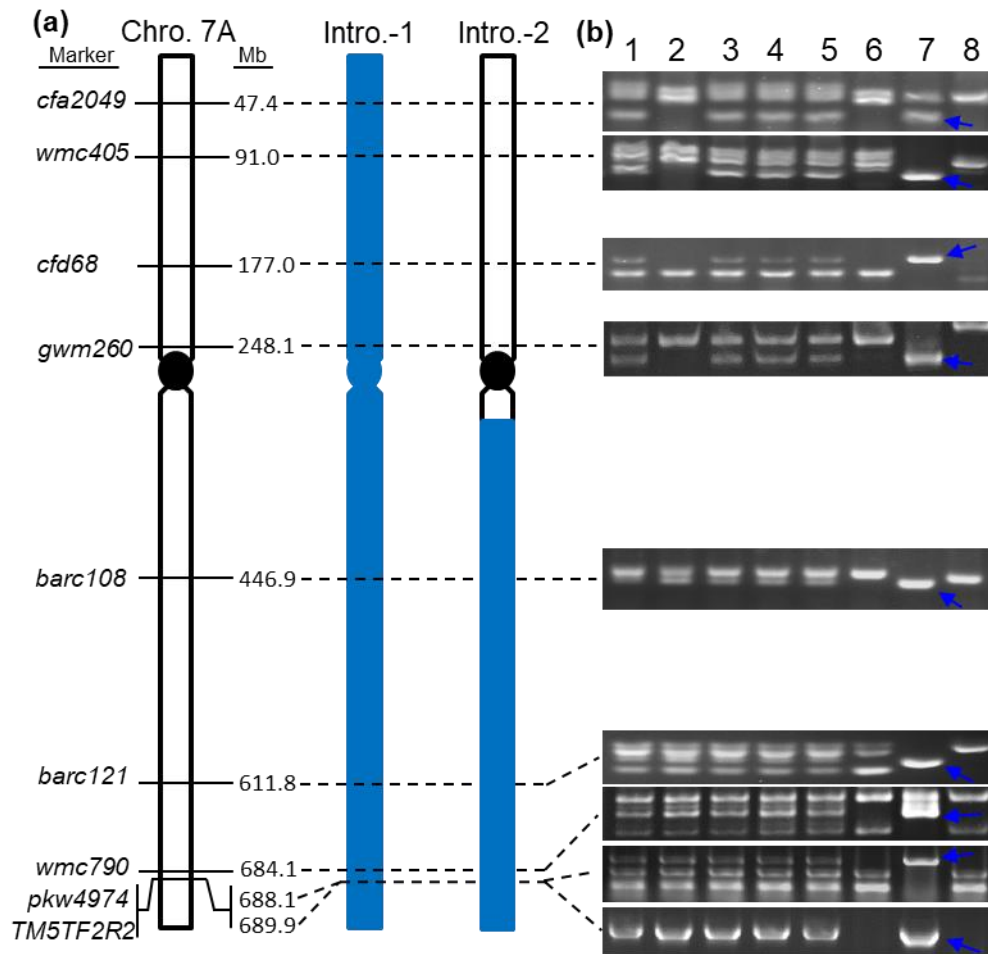

**Figure S9** Markers across chromosome 7A were used to analyze the length of introgressed *T. monococcum* segments. (a) The physical positions of markers and the length of the introgression segments. Blue rectangles indicate *T. monococcum* chromatin. The positions were based on the reference genome of Chinese Spring Refseq v1.0. (b) PCR products from nine selected markers. 1-5, BC<sub>3</sub>F<sub>1</sub> plants 1, 2, 3, 4 and 5; 6, Fielder; 7, PI 306540; and 8, Kronos. Blue arrows indicate the bands from PI 306540.

**Table S1.** Avirulence/virulence formulae of *Pgt* races, and their responses to *SrTm5*. The data shown here was based on the current study and several previous studies (Li et al. 2016; Chao et al. 2017; Li et al. 2018; Chen et al. 2018a; Chen et al. 2020).

| Race (isolate) <sup>#</sup>    | Origin | Response to <i>SrTm5</i> | Avirulence                                                                | Virulence                                                                                            |
|--------------------------------|--------|--------------------------|---------------------------------------------------------------------------|------------------------------------------------------------------------------------------------------|
| BCCBC (09CA115-2)              | USA    | virulence                | <i>Sr5 6 7b 8a 9a 9d 9e 9b 10 11 21 24 30 31</i><br><i>36 38 Tmp</i>      | <i>Sr9g 17 McN</i>                                                                                   |
| TTKSK (04KEN156/04)            | Kenya  | <b>avirulence</b>        | <i>Sr21 24 36 Tmp</i>                                                     | <i>Sr5 6 7b 8a 9a 9b 9d 9e 9g 10 11 17 30 31 38</i><br><i>McN</i>                                    |
| MCCFC (59KS19)                 | USA    | <b>avirulence</b>        | <i>6 8a 9a 9d 9e 9b 11 21 24 31 30 36 38</i>                              | <i>5 7b 9g 10 17 McN Tmp</i>                                                                         |
| TTKST (06KEN19-V-3)            | Kenya  | <b>avirulence</b>        | <i>21 36 Tmp</i>                                                          | <i>5 6 7b 8a 9a 9b 9d 9e 9g 10 11 17 24 30 31 38</i><br><i>McN</i>                                   |
| 34MTGSM (20GSA1)               | China  | <b>avirulence</b>        | <i>Sr9e 12 13 14 17 21 22 23 26 30 31 33 35</i><br><i>36 37 38 47 Tmp</i> | <i>Sr5 6 7b 8a 9a 9b 9d 9f 9g 10 11 15 16 18 19</i><br><i>20 24 25 27 28 29 32 34 39 McN</i>         |
| QFCSC (06ND76C)                | USA    | virulence                | <i>6 7b 9e 9b 11 24 31 30 36 38 Tmp</i>                                   | <i>5 8a 9a 9d 9g 10 17 21 McN</i>                                                                    |
| TRTTF (06YEM34-1)              | Yemen  | virulence                | <i>8a 24 31</i>                                                           | <i>5 6 7b 9a 9b 9d 9e 9g 10 11 17 21 30 36 38</i><br><i>McN Tmp</i>                                  |
| TTTTF (01MN84A-1-2)            | USA    | virulence                | <i>24 31</i>                                                              | <i>5 6 7b 8a 9a 9b 9d 9e 9g 10 11 17 21 30 36 38</i><br><i>McN Tmp</i>                               |
| 21C3CTTM (20GH13)              | China  | virulence                | <i>Sr5 9e 14 19 21 22 23 26 27 31 33 35 37</i><br><i>38 39 47</i>         | <i>Sr6 7b 8a 9a 9b 9d 9f 9g 10 11 12 13 15 16 17</i><br><i>18 20 24 25 28 29 30 32 34 36 Tmp McN</i> |
| RTJRM (mutant strain, 20IAS11) | China  | virulence                | <i>Sr13 14 17 18 19 20 22 23 25 27 28 29 31</i><br><i>32 33 36 37</i>     | <i>Sr5 8a 10 11 12 15 21 24 30 34 35 Tmp McN</i>                                                     |

<sup>#</sup>, Chinese race 34PKUSC (19IAS08) was provided by Dr. Jianhui Wu at Northwest Agriculture & Forestry University in China, and its responses to different *Sr* resistance genes is unknown.

**Table S2.** Comparison of SrTm5 protein with polymorphisms that discriminate perfectly between Sr22 susceptible and resistant haplotypes from Steuernagel et al. (2016). SrTm5 carries the same amino acids as the resistant haplotypes at all three positions 381, 605 and 655. BLOSUM62 scores were obtained from the following link ([https://www.ncbi.nlm.nih.gov/IEB/ToolBox/C\\_DOC/lxr/source/data/BLOSUM62](https://www.ncbi.nlm.nih.gov/IEB/ToolBox/C_DOC/lxr/source/data/BLOSUM62)). The resistant (PI 306540) and susceptible (PI 272557) parents are indicated in red.

| Positions  | Accessions |         |         |          |          |          |                 |      |         |          |          |          |                 |           | BLOSUM62 |
|------------|------------|---------|---------|----------|----------|----------|-----------------|------|---------|----------|----------|----------|-----------------|-----------|----------|
|            | SCHOMBURGK | IG44855 | IG44921 | PI190945 | PI289605 | PI330550 | <b>PI306540</b> | DV92 | IG44878 | PI355523 | PI573523 | Westonia | <b>PI272557</b> |           |          |
|            | R1         | R2      | R3      | R4       | R5       | R6       | <i>SrTm5</i>    | S1   | S2      | S3       | S4       | S5       | <b>S6</b>       |           |          |
| <b>381</b> | V          | V       | V       | V        | V        | V        | <b>V</b>        | L    | L       | L        | L        | L        | <b>L</b>        | <b>1</b>  |          |
| <b>605</b> | S          | S       | S       | S        | S        | S        | <b>S</b>        | F    | F       | Y        | F        | F        | <b>F</b>        | <b>-2</b> |          |
| <b>655</b> | G          | G       | G       | G        | G        | G        | <b>G</b>        | D    | D       | D        | D        | D        | <b>D</b>        | <b>-1</b> |          |
| Phenotypes | Res.       | Res.    | Res.    | Res.     | Res.     | Res.     | <b>Res.</b>     | Sus. | Sus.    | Sus.     | Sus.     | Sus.     | <b>Sus.</b>     |           |          |

**Table S3.** Segregation ratios in T<sub>1</sub> and T<sub>2</sub> transgenic families detected using PCR markers *Tm5F3R4*, *TM5TF2R2*, and *TM5TF3R3* (Table 1). We genotyped more than 20 T<sub>1</sub> plants from each transgenic family. All transgenic T<sub>1</sub> families except T<sub>1</sub>-Tm505 showed significant segregation distortion with an excess of non-transgenic plants. Genotyping of T<sub>2</sub> plants from one positive T<sub>1</sub> plant for each transgenic event revealed that the transgene was fixed in families T<sub>2</sub>-Tm505-15, T<sub>2</sub>-Tm514-2, T<sub>2</sub>-Tm517-1, T<sub>2</sub>-Tm548-3, T<sub>2</sub>-Tm554-2 and T<sub>2</sub>-Tm558-7, and segregating in families T<sub>2</sub>-Tm515-6 and T<sub>2</sub>-Tm547-3.

| Genotyping       |        | Transgenic T <sub>1</sub> families |                         |                         |                         |                         |                         |                         |                         |
|------------------|--------|------------------------------------|-------------------------|-------------------------|-------------------------|-------------------------|-------------------------|-------------------------|-------------------------|
|                  |        | T <sub>1</sub> -Tm505              | T <sub>1</sub> -Tm514   | T <sub>1</sub> -Tm515   | T <sub>1</sub> -Tm517   | T <sub>1</sub> -Tm547   | T <sub>1</sub> -Tm548   | T <sub>1</sub> -Tm554   | T <sub>1</sub> -Tm558   |
| Present (+)      |        | 22                                 | 8                       | 6                       | 10                      | 15                      | 12                      | 8                       | 3                       |
| Absent (-)       |        | 3                                  | 20                      | 16                      | 88                      | 45                      | 20                      | 20                      | 18                      |
| $\chi^2$ P value | 1 copy | 0.133                              | 1.4E-08                 | 2.3E-07                 | 1.2E-49                 | 3.7E-19                 | 9.6E-07                 | 1.4E-08                 | 1.3E-10                 |
| Genotyping       |        | Transgenic T <sub>2</sub> families |                         |                         |                         |                         |                         |                         |                         |
|                  |        | T <sub>2</sub> -Tm505-15           | T <sub>2</sub> -Tm514-2 | T <sub>2</sub> -Tm515-6 | T <sub>2</sub> -Tm517-1 | T <sub>2</sub> -Tm547-3 | T <sub>2</sub> -Tm548-3 | T <sub>2</sub> -Tm554-2 | T <sub>2</sub> -Tm558-7 |
| Present (+)      |        | 23                                 | 33                      | 23                      | 39                      | 12                      | 22                      | 24                      | 21                      |
| Absent (-)       |        | 0                                  | 0                       | 16                      | 0                       | 12                      | 0                       | 0                       | 0                       |
| $\chi^2$ P value | 1 copy | 0.006                              | 9.1E-04                 | 0.021                   | 3.1E-04                 | 0.005                   | 0.007                   | 0.005                   | 0.008                   |



**Table S4.** Resistance profiles of *Sr22b* (= *SrTm5*) and *Sr22a* (haplotypes R1 and R4) to multiple *Pgt* races. Infection types for *Sr22b* are based on the selected F<sub>5</sub> line TmR54-3, whereas *Sr22a* infection types are from *T. aestivum* lines Schomburgk / PI 660256 (R1) and *T. monococcum* accession PI 190945 (R4). PI 272557 was used as susceptible control.

| <i>Pgt</i> race    | <i>Sr22b</i> 2x <sup>a</sup> | <i>Sr22a</i> ( <i>Sr22TB</i> , R1) 6x <sup>a</sup> | <i>Sr22a</i> (R4) 2x <sup>a</sup> | No <i>Sr</i> gene 2x <sup>a</sup> |
|--------------------|------------------------------|----------------------------------------------------|-----------------------------------|-----------------------------------|
|                    | TmR54-3                      | Schomburgk/PI 660256                               | PI 190945                         | PI 272557                         |
| TTKSK <sup>b</sup> | ;1                           | 2-                                                 | 1                                 | 4                                 |
| MCCFC <sup>b</sup> | 1;                           | 2-                                                 | ;1                                | 4                                 |
| TTKST              | ;                            | Not available                                      | Not available                     | Not available                     |
| 34PKUSC            | 1                            | 2-                                                 | ;1                                | 3+                                |
| 34MTGSM            | 1;                           | 2-                                                 | ;1                                | 3+                                |
| BCCBC              | 3+                           | 2-                                                 | ;1                                | 3+                                |
| QFCSC <sup>b</sup> | 3+                           | ;2-                                                | ;1-                               | 4                                 |
| TRTTF <sup>b</sup> | 3+                           | 2-;                                                | 1;                                | 3+                                |
| TTTTF <sup>b</sup> | 3+                           | 2                                                  | 2-                                | 4                                 |

<sup>a</sup>, 2x = diploid wheat (*T. monococcum*), 6x= hexaploid wheat (*T. aestivum*).

<sup>b</sup>, Based on previous studies (Steuernagel et al. 2016, Rouse & Jin, 2011 and Chen et al. 2018a)

**Table S5.** A collection of 92 accessions of *T. monococcum*, 23 of *T. turgidum*, and 53 of *T. aestivum* was used to test the presence of *Sr22b*. All these accessions were screened using the diagnostic marker *TM5TF2R2* and the other two sequence-based markers *TM5AF6R8* and *TM5AF4R4*. PI, CItR and GSTR numbers correspond to Germplasm Resources Information Network (GRIN) numbers.

| Accessions                                                                                                                                                                                                                                                                                                                                                                                                                                                                                                                                                                                                                                                                                                                                                                                                                                                                                   | Acc. No. | With/without <i>Sr22b</i> |
|----------------------------------------------------------------------------------------------------------------------------------------------------------------------------------------------------------------------------------------------------------------------------------------------------------------------------------------------------------------------------------------------------------------------------------------------------------------------------------------------------------------------------------------------------------------------------------------------------------------------------------------------------------------------------------------------------------------------------------------------------------------------------------------------------------------------------------------------------------------------------------------------|----------|---------------------------|
| <b><i>T. monococcum</i></b> : PI 306540, PI 277130, PI 306545, CItR 17657, PI 277131-2, PI 306544, PI 306547, PI 352480, PI 355536, PI 355541, PI 435000, PI 435001, PI 221414, <b>PI 355538, PI 362610, PI 377668</b>                                                                                                                                                                                                                                                                                                                                                                                                                                                                                                                                                                                                                                                                       | 16       | with (+)                  |
| <b><i>T. monococcum</i></b> : PI 418580, PI 487249, CItR 17671, PI 427507, PI 272560, PI 427580, CItR 17674, PI 245726, PI 272557, PI 573520, PI 560720, G3116, DV92, PI 573523, PI 427464, PI 427444, PI 352273, PI 427465, PI 272556, CI2433, PI 427498, PI 352505, PI 190942, PI 277121, CItR 14520, CItR 13963, PI 427662, PI 427478, CItR 13964, CItR 17655, PI 168803, PI 168806, PI 190940, PI 289605, PI 352486, PI 355517, PI 355524, PI 428158, PI 503874, PI 427452, PI 330528, PI 554480, PI 427467, PI 428012, PI 538540, PI 362554, PI 427497, PI 427993, PI 427476, CItR 17741, PI 427450, PI 554519, PI 427661, PI 427405, PI 427540, PI 352504, PI 427453, PI 427510, PI 427603, CItR 17665, PI 355453, PI 427477, PI 427484, PI 427488, PI 554517, PI 401412, PI 427994, PI 427472, PI 427468, PI 352270, PI 427592, PI 427796, PI 427527, PI 427808, PI 190945, PI 362553 | 76       | without (-)               |
| <b><i>T. turgidum</i></b> : 8155B, Rusty, D447, Kronos, Svevo, LineE, CItR 15326, PI 478298, PI 584833, CItR 13768, PI 331260, PI 480016, CItR 15892, PI 510696, Zavitan, PI 94701, PI 606286, PI 480148, PI 191365, CItR 13165, PI 496260, PI 560877, PI 428016                                                                                                                                                                                                                                                                                                                                                                                                                                                                                                                                                                                                                             | 23       | without (-)               |
| <b><i>T. aestivum</i></b> : Xiaoyan22, Zhengzhou5389, Chinese Spring, Cadenza, Lassik, PI 675640, Patwin, UC1110, PI 660056, ISr8a-Ra, CItR 15082, PI 660060, PI 178759, PI 648419, PI 679621, PI 181434, PI 660059, PI 182527, PI 189747, PI 430067, PI 660057, PI 648417, PI 442904, PI 603918, PI 600683, GSTR434, GSTR429, GSTR428, GSTR420, GSTR501, GSTR522, GSTR425, PI 679605, GSTR409, PI 679598, PI 679603, GSTR437, PI 566596, GSTR441, Avocet-S, Pavon, Fielder, PI 638738, Taichang29, SY95-71, PI 675564, PI 672538, PI 277012, PI 596533, Chuanmai42, Xinong511, Taimai198, PI 634936                                                                                                                                                                                                                                                                                         | 53       | without (-)               |

**Table S6.** Geographic distribution of *T. monococcum* accessions, and their reactions against *Pgt* races TTKSK, MCCFC and 34PKUSC. The data for races TTKSK and MCCFC was based on the previous study (Rouse & Jin, 2011). Gene postulations were based upon infection types and genotypes from the diagnostic markers of cloned *Sr* genes *Sr21*, *Sr22*, *Sr35* and *Sr60* (Saintenac et al., 2013, Steuernagel et al., 2016, Chen et al., 2018b, Chen et al., 2020). +, with *Sr22b*; -, without *Sr22b*.

| Accession  | With / without <i>Sr22b</i> | Source              | Species <sup>a</sup> | TTKSK     | MCCFC | 34PKUSC | Gene Postulation                |
|------------|-----------------------------|---------------------|----------------------|-----------|-------|---------|---------------------------------|
| TmR54-3    | (+)                         | -                   | <i>T. m. m</i>       | ;1        | 1;    | 1       | <i>Sr22b</i>                    |
| PI 306540  | (+)                         | Romania             | <i>T. m. m</i>       | 0;        | 0     | 0       | <i>Sr21, SrTm4, Sr60, Sr22b</i> |
| PI277131-2 | (+)                         | Albania             | <i>T. m. m</i>       | ;         | ;1/;  | ;1      | <i>Sr21, Sr60, Sr22b</i>        |
| PI 277130  | (+)                         | Albania             | <i>T. m. m</i>       | ;         | 0;    | ;1      | <i>Sr21, Sr60, Sr22b</i>        |
| PI 306545  | (+)                         | Romania             | <i>T. m. m</i>       | ;1-       | 0;    | ;1      | <i>Sr21, Sr60, Sr22b</i>        |
| CItr 17657 | (+)                         | United States       | <i>T. m. m</i>       | ;         | 0;    | ;1      | <i>Sr21, Sr22b</i>              |
| PI 306544  | (+)                         | Romania             | <i>T. m. m</i>       | 0;        | 0;    | ;1      | <i>Sr21, Sr60, Sr22b</i>        |
| PI 306547  | (+)                         | Romania             | <i>T. m. m</i>       | ;         | 0;    | ;1      | <i>Sr21, Sr60, Sr22b</i>        |
| PI 352480  | (+)                         | Albania             | <i>T. m. m</i>       | 0;        | 0;    | ;1-     | <i>Sr21, Sr60, Sr22b</i>        |
| PI 355536  | (+)                         | Italy               | <i>T. m. m</i>       | 0         | ;1    | 0       | <i>Sr21, Sr35, Sr22b</i>        |
| PI 355541  | (+)                         | Albania             | <i>T. m. m</i>       | 0;        | 0;    | ;1-     | <i>Sr21, Sr60, Sr22b</i>        |
| PI 435000  | (+)                         | Yugoslavia          | <i>T. m. m</i>       | 0;        | ;     | ;1-     | <i>Sr21, Sr60, Sr22b</i>        |
| PI 435001  | (+)                         | Bosnia and Herzego. | <i>T. m. m</i>       | ;         | ;     | 0;      | <i>Sr21, Sr60, Sr22b</i>        |
| PI 221414  | (+)                         | Yugoslavia          | <i>T. m. m</i>       | 0         | 0;    | ;1-     | <i>Sr21, Sr60, Sr22b</i>        |
| PI 355538  | (+)                         | Balkans             | <i>T. m. m</i>       | ;1-       | ;1-   | 1       | <i>Sr22b</i>                    |
| PI 377668  | (+)                         | Former Yugoslavia   | <i>T. m. m</i>       | ;         | 0;    | 1       | <i>Sr22b</i>                    |
| PI 362610  | (+)                         | Macedonia           | <i>T. m. m</i>       | ;1-       | 0;    | 1       | <i>Sr22b</i>                    |
| PI 418580  | (-)                         | Azerbaijan          | <i>T. m. a.</i>      | 3+        | 4     | -       | <i>Susceptible</i>              |
| PI 487249  | (-)                         | Syria               | <i>T. m. a.</i>      | 2+/3/12+Z | ;1    | -       | <i>Sr21</i>                     |
| CItr 17671 | (-)                         | Turkey              | <i>T. m. a.</i>      | 1/12Z     | ;1    | -       | <i>Sr21</i>                     |
| PI 427507  | (-)                         | Turkey              | <i>T. m. a.</i>      | 3-        | 1     | -       | <i>Sr21</i>                     |
| PI 272560  | (-)                         | Hungary             | <i>T. m. m</i>       | 0         | 4     | -       | <i>Sr35</i>                     |
| PI 427580  | (-)                         | Turkey              | <i>T. m. a.</i>      | 123Z      | ;1    | -       | <i>Sr21</i>                     |
| CItr 17674 | (-)                         | Iran                | <i>T. m. a.</i>      | 2++       | 1     | -       | <i>Sr21</i>                     |
| PI 245726  | (-)                         | Turkey              | <i>T. m. a.</i>      | -         | 4     | -       | <i>Susceptible</i>              |
| PI 272557  | (-)                         | Hungary             | <i>T. m. m</i>       | 4         | 4     | 4       | <i>Susceptible</i>              |
| PI 573520  | (-)                         | Turkey              | <i>T. m. a.</i>      | 2-        | ;1    | -       | <i>Sr22</i>                     |
| PI 560720  | (-)                         | Turkey              | <i>T. m. m</i>       | 2-        | 4     | -       | <i>Susceptible</i>              |
| G3116      | (-)                         | Lebanon             | <i>T. m. a.</i>      | 2,2+      | 1     | -       | <i>Sr21</i>                     |
| DV92       | (-)                         | -                   | <i>T. m. m</i>       | 0;        | 1     | -       | <i>Sr21, Sr35</i>               |
| PI 573523  | (-)                         | Turkey              | <i>T. m. m</i>       | ;N        | ;1-   | -       | <i>Sr22</i>                     |
| PI 427464  | (-)                         | Azerbaijan          | <i>T. m. a.</i>      | 2+3Z      | ;1    | -       | <i>Sr21</i>                     |

|            |     |                     |                 |             |     |   |                    |
|------------|-----|---------------------|-----------------|-------------|-----|---|--------------------|
| PI 427444  | (-) | Turkey              | <i>T. m. a.</i> | 22+Z        | 1   | - | <i>Sr21</i>        |
| PI 352273  | (-) | Asia Minor          | <i>T. m. a.</i> | 12Z         | 1   | - | <i>Sr21</i>        |
| PI 427465  | (-) | Armenia             | <i>T. m. a.</i> | 2+3Z        | 2   | - | <i>Sr21</i>        |
| PI 272556  | (-) | Hungary             | <i>T. m. a.</i> | 4           | 4   | 4 | <i>Susceptible</i> |
| CI 2433    | (-) | Germany             | <i>T. m. m.</i> | 2+          | ;1  | - | <i>Sr21</i>        |
| PI 427498  | (-) | Turkey              | <i>T. m. a.</i> | 3           | 22+ | - | <i>Sr21</i>        |
| PI 352505  | (-) | Switzerland         | <i>T. m. a.</i> | ;1          | ;1  | - | <i>Sr22</i>        |
| PI 190942  | (-) | Spain               | <i>T. m. m.</i> | 1           | ;1  | - | <i>Sr21</i>        |
| PI 277121  | (-) | Germany             | <i>T. m. a.</i> | 2+3Z        | ;1  | - | <i>Sr21</i>        |
| CItr 14520 | (-) | Canada              | <i>T. m. m.</i> | 2           | ;1  | - | <i>Sr21</i>        |
| CItr 13963 | (-) | United States       | <i>T. m. m.</i> | 2+          | ;1  | - | <i>Sr21</i>        |
| PI 427662  | (-) | Iraq                | <i>T. m. a.</i> | 3+          | 33+ | - | <i>Susceptible</i> |
| PI 427478  | (-) | Turkey              | <i>T. m. a.</i> | 1/12Z       | ;1  | - | <i>Sr21</i>        |
| CItr 13964 | (-) | United States       | <i>T. m. m.</i> | 3-          | ;1  | - | <i>Sr21</i>        |
| CItr 17655 | (-) | United States       | <i>T. m. m.</i> | 3-          | ;1  | - | <i>Sr21</i>        |
| PI 168803  | (-) | United States       | <i>T. m. m.</i> | 3-          | ;1  | - | <i>Sr21</i>        |
| PI 168806  | (-) | United States       | <i>T. m. m.</i> | 22+3Z       | ;1  | - | <i>Sr21</i>        |
| PI 190940  | (-) | Spain               | <i>T. m. m.</i> | 3-          | ;1  | - | <i>Sr21</i>        |
| PI 289605  | (-) | United Kingdom      | <i>T. m. m.</i> | 2-          | ;1  | - | <i>Sr22</i>        |
| PI 352486  | (-) | Switzerland         | <i>T. m. m.</i> | 2-          | ;1  | - | <i>Sr22</i>        |
| PI 355517  | (-) | Asia Minor          | <i>T. m. m.</i> | 12-         | ;1  | - | <i>Sr22</i>        |
| PI 355524  | (-) | Germany             | <i>T. m. m.</i> | ;1          | ;1  | - | <i>Sr22</i>        |
| PI 428158  | (-) | United Kingdom      | <i>T. m. m.</i> | ;12-        | ;1  | - | <i>Sr21, Sr60</i>  |
| PI 503874  | (-) | South Africa        | <i>T. m. m.</i> | 3+          | ;1  | - | <i>Susceptible</i> |
| PI 427452  | (-) | Turkey              | <i>T. m. a.</i> | 12Z         | 1   | - | <i>Sr21</i>        |
| PI 330528  | (-) | United Kingdom      | <i>T. m. a.</i> | 1;          | ;1  | - | <i>Sr22</i>        |
| PI 554480  | (-) | Turkey              | <i>T. m. a.</i> | 3-          | ;1  | - | <i>Sr21</i>        |
| PI 427467  | (-) | Azerbaijan          | <i>T. m. a.</i> | 2+3Z        | 2   | - | <i>Sr21</i>        |
| PI 428012  | (-) | Armenia             | <i>T. m. a.</i> | 12+Z        | ;1  | - | <i>Sr21</i>        |
| PI 538540  | (-) | Turkey              | <i>T. m. a.</i> | 33+         | 4   | - | <i>Susceptible</i> |
| PI 362554  | (-) | Yugoslavia          | <i>T. m. m.</i> | ;1          | ;1  | - | <i>Sr22</i>        |
| PI 427497  | (-) | Turkey              | <i>T. m. a.</i> | 22+Z        | 1   | - | <i>Sr21</i>        |
| PI 427993  | (-) | Lebanon             | <i>T. m. a.</i> | 123Z/1;/12Z | ;1  | - | <i>Sr21</i>        |
| PI 427476  | (-) | Turkey              | <i>T. m. a.</i> | 1           | ;1  | - | <i>Sr21</i>        |
| CItr 17741 | (-) | United States       | <i>T. m. a.</i> | 2++         | ;1  | - | <i>Sr21</i>        |
| PI 427450  | (-) | Turkey              | <i>T. m. a.</i> | 3-          | ;1  | - | <i>Sr21</i>        |
| PI 554519  | (-) | Former Soviet Union | <i>T. m. a.</i> | 3+          | 4   | - | <i>Susceptible</i> |
| PI 427661  | (-) | Iraq                | <i>T. m. a.</i> | 3           | 3+  | - | <i>Susceptible</i> |
| PI 427405  | (-) | Iraq                | <i>T. m. a.</i> | 2+3Z        | 1   | - | <i>Sr21</i>        |
| PI 427540  | (-) | Turkey              | <i>T. m. a.</i> | 2+3Z        | 1   | - | <i>Sr21</i>        |
| PI 352504  | (-) | Germany             | <i>T. m. a.</i> | 2-          | 1   | - | <i>Sr22</i>        |
| PI 427453  | (-) | Turkey              | <i>T. m. a.</i> | 22+Z        | 1   | - | <i>Sr21</i>        |
| PI 427510  | (-) | Turkey              | <i>T. m. a.</i> | 3           | 22+ | - | <i>Sr21</i>        |
| PI 427603  | (-) | Turkey              | <i>T. m. a.</i> | 2+3Z        | ;1  | - | <i>Sr21</i>        |

|            |     |                     |                 |       |     |   |                    |
|------------|-----|---------------------|-----------------|-------|-----|---|--------------------|
| Cltr 17665 | (-) | Iran                | <i>T. m. a.</i> | 1;    | 1   | - | <i>Sr21</i>        |
| PI 355453  | (-) | Asia Minor          | <i>T. m. a.</i> | 2     | 1   | - | <i>Sr21</i>        |
| PI 427477  | (-) | Turkey              | <i>T. m. a.</i> | 12-Z  | ;1  | - | <i>Sr21</i>        |
| PI 427484  | (-) | Turkey              | <i>T. m. a.</i> | 2/2+Z | ;1  | - | <i>Sr21</i>        |
| PI 427488  | (-) | Turkey              | <i>T. m. a.</i> | 22+Z  | 22+ | - | <i>Sr21</i>        |
| PI 554517  | (-) | Former Soviet Union | <i>T. m. a.</i> | 1     | ;1  | - | <i>Sr22</i>        |
| PI 401412  | (-) | Iran                | <i>T. m. a.</i> | 3     | 3+  | - | <i>Susceptible</i> |
| PI 427994  | (-) | Lebanon             | <i>T. m. a.</i> | 12+Z  | ;1+ | - | <i>Sr21</i>        |
| PI 427472  | (-) | Turkey              | <i>T. m. a.</i> | 1     | ;1  | - | <i>Sr21</i>        |
| PI 427468  | (-) | Azerbaijan          | <i>T. m. a.</i> | 2+3Z  | 1   | - | <i>Sr21</i>        |
| PI 352270  | (-) | Germany             | <i>T. m. a.</i> | 2+3Z  | 1   | - | <i>Sr21</i>        |
| PI 427592  | (-) | Turkey              | <i>T. m. a.</i> | 12+Z  | ;1  | - | <i>Sr21</i>        |
| PI 427796  | (-) | Iran                | <i>T. m. a.</i> | 1     | ;1  | - | <i>Sr21</i>        |
| PI 427527  | (-) | Turkey              | <i>T. m. a.</i> | 12+Z  | ;1  | - | <i>Sr21</i>        |
| PI 427808  | (-) | Iran                | <i>T. m. a.</i> | 1     | ;1  | - | <i>Sr21</i>        |
| PI 190945  | (-) | Spain               | <i>T. m. m.</i> | 1     | ;1  | - | <i>Sr22</i>        |
| PI 362553  | (-) | Yugoslavia          | <i>T. m. m.</i> | 1     | ;1  | - | <i>Sr22</i>        |

<sup>a</sup>, *T. m. m.* = *Triticum monococcum* subsp. *monococcum*; *T. m. a.* = *Triticum monococcum* subsp. *aegilopoides*.

## References

- Li, T., Wu, X., Xu, X., Wang, W. and Cao, Y.** (2016) Postulation of seedling stem rust resistance genes of Yunnan wheat cultivars in China. *Plant Protect Sci*, **52**, 242-249.
- Chao, S., Rouse, M.N., Acevedo, M., Szabo - Hever, A., Bockelman, H., Bonman, J.M., Elias, E., Klindworth, D. and Xu, S.** (2017) Evaluation of genetic diversity and host resistance to stem rust in USDA NSGC durum wheat accessions. *The plant genome*, <https://doi.org/10.3835/plantgenome2016.07.0071>.
- Li, T.Y., Ma, Y.C., Wu, X.X., Chen, S., Xu, X.F., Wang, H., Cao, Y.Y. and Xuan, Y.H.** (2018) Race and virulence characterization of *Puccinia graminis* f. sp. *tritici* in China. *Plos One*, **13**, e0197579.
- Chen, S., Guo, Y., Briggs, J., Dubach, F., Chao, S., Zhang, W., Rouse, M.N. and Dubcovsky, J.** (2018a) Mapping and characterization of wheat stem rust resistance genes *SrTm5* and *Sr60* from *Triticum monococcum*. *Theor Appl Genet*, **131**, 625-635.
- Chen, S., Rouse, M.N., Zhang, W., Zhang, X., Guo, Y., Briggs, J. and Dubcovsky, J.** (2020) Wheat gene *Sr60* encodes a protein with two putative kinase domains that confers resistance to stem rust. *New Phytol*, **225**, 948-95
- Rouse M, Jin Y.** 2011. Stem rust resistance in A-genome diploid relatives of wheat. *Plant Dis* **95**: 941-944.
- Saintenac, C., Zhang, W., Salcedo, A., Rouse, M., Trick, H., Akhunov, E. and Dubcovsky, J.** (2013) Identification of wheat gene *Sr35* that confers resistance to Ug99 stem rust race group. *Science*, **341**, 783-786.
- Stuernagel, B., Periyannan, S.K., Hernandez-Pinzon, I., Witek, K., Rouse, M.N., Yu, G., Hatta, A., Ayliffe, M., Bariana, H., Jones, J.D., Lagudah, E.S. and Wulff, B.B.** (2016) Rapid cloning of disease-resistance genes in plants using mutagenesis and sequence capture. *Nat Biotechnol*, **34**, 652-655.
- Chen, S., Zhang, W., Bolus, S., Rouse, M.N. and Dubcovsky, J.** (2018b) Identification and characterization of wheat stem rust resistance gene *Sr21* effective against the Ug99 race group at high temperature. *PLoS Genet*, **14**, e1007287.
